# Supplementary material for: A Novel CDK9 Inhibitor Shows Potent Antitumor Efficacy in Preclinical Hematologic Tumor Models
Source: Oxford University Press journal article supplement (doi:10.1158/1535-7163.mct-13-0849), 2014-04-01
Supplement: 15357163mct130849-sup-tab_2_excel.xlsx [file 15357163mct130849-sup-tab_2_excel.xlsx]

## Sheet: Cdk9 MCT Suppl TableS2 FINAL 20
261 signature gene expression in sens and res cell lines
	GeneSymbol	logFC	Up/Down	A2780	MV411	A549	HEPG2	MDAMB436	HLE	HCT116	ASPC1	BT474	HT29	KATOIII
Classes	X	X	X	1	1	1	1	1	1	0	0	0	0	0
212413_at	2013-09-06	2.83413	Up	9.13468	9.55209	7.38457	8.50938	7.44708	9.03892	6.62644	6.31651	6.07039	2.82782	6.54381
203504_s_at	ABCA1	3.87978	Up	9.834	7.45039	9.63445	11.6405	10.8413	9.23912	4.19377	7.64386	4.05311	7.48301	6.09381
203505_at	ABCA1	3.53412	Up	10.2562	8.93575	10.566	11.8035	10.9168	10.2262	5.94252	8.39532	6.25172	8.01625	5.97728
200974_at	ACTA2	2.98201	Up	11.4334	8.93575	9.67737	11.6155	9.02791	7.46761	7.2817	7.03672	5.84046	6.02237	7.3733
201272_at	AKR1B1	4.71496	Up	12.5284	11.4477	15.0553	12.8807	15.2454	7.13443	11.5007	6.1819	6.90207	5.80735	7.9431
204416_x_at	APOC1	4.49647	Up	11.1769	7.28077	11.4266	13.8461	8.14364	9.17368	2.94486	7.60437	3.43296	6.21917	8.18933
232197_x_at	ARSB	2.38659	Up	8.65964	9.74197	9.07815	9.93221	8.47695	8.80639	7.2211	6.23266	7.88692	4.848	7.45779
226517_at	BCAT1	8.25152	Up	13.1214	11.3115	11.1689	11.8764	12.3432	12.7242	3.12101	4.51728	0.925999	4.71149	5.92125
225285_at	BCAT1	7.19821	Up	13.8559	11.64	11.9638	12.3479	12.8351	13.2966	5.70044	4.38543	5.37851	5.3147	6.51254
214452_at	BCAT1	5.83277	Up	11.1109	7.56453	8.75322	9	10.3551	10.6095	3.90689	2.88753	3.54844	2.37851	5.94251
201849_at	BNIP3	7.05565	Up	13.1348	11.796	12.424	13.4255	12.8209	12.8541	11.2499	1.07039	11.6417	3.47249	1
201848_s_at	BNIP3	6.34707	Up	12.8442	10.371	11.6341	13.1129	12.6577	11.4926	10.0104	3.08746	10.3657	1.80735	3.08746
223960_s_at	C16orf5	4.38577	Up	8.48059	10.4755	7.6014	10.8782	9.36632	8.57289	6.77083	7.76222	4.09592	1.37851	4.20945
218183_at	C16orf5	2.33456	Up	7.55689	9.20701	7.19081	8.78431	8.10957	7.07039	6.3906	7.51964	3.59694	5.53916	5.21335
226778_at	C8orf42	3.48342	Up	8.10224	4.57289	8.13494	7.98812	7.6858	7.61692	1.58496	4.22497	7.5744	4.06178	1.88753
1553972_a_at	CBS	4.66883	Up	12.208	8.93664	9.2555	10.179	7.61102	8.30788	1.53605	4.37851	8.34829	4.59694	4.87774
212816_s_at	CBS	4.46681	Up	11.7629	8.48784	8.09487	9.31832	7.0917	8.01792	3.01792	2.76553	7.97039	2.53605	5.35403
207006_s_at	CCDC106	4.9012	Up	8.20994	9.16239	7.28725	7.36194	7.61471	8.11426	2.63227	2.1375	1.72247	7.41532	1.37851
225045_at	CCDC88A	5.44763	Up	9.87866	8.94924	9.18711	9.26936	10.4141	10.4294	7.10643	9.4208	0.678072	0.485427	3.51096
203799_at	CD302	3.27018	Up	7.51333	11.8985	9.00141	11.2684	9.02956	9.49366	5.23266	4.03562	6.82528	9.27426	6.78529
203440_at	CDH2	6.44474	Up	11.3799	6.24031	12.4766	12.0492	12.1819	11.425	4.57894	2.72247	7.58646	5.41954	2.26303
204065_at	CHST10	3.48787	Up	9.4814	9.43983	8.81986	9.10486	9.37764	6.39746	3.21723	7.37243	7.88996	4.20945	3.72247
1555705_a_at	CMTM3	2.45647	Up	9.61232	9.24745	9.10512	9.53644	9.15987	8.50303	7.95536	7.91946	6.98982	7.20261	3.62059
213110_s_at	COL4A5	3.79548	Up	9.8248	5.53605	10.0604	10.4274	10.3371	9.22689	8.28031	3.47249	7.60733	2.7866	5.05311
203695_s_at	DFNA5	5.21756	Up	10.4189	8.61765	12.6966	11.4817	11.5144	11.4036	8.54921	9.63988	4.86295	3.67807	2.29278
242138_at	DLX1	4.13168	Up	12.6756	11.8956	7.39832	6.65535	8.91349	8.14924	7.07895	5.6893	7.18686	4.30743	1.48543
204646_at	DPYD	3.61108	Up	9.47735	10.9714	9.224	8.82337	10.6163	10.5822	6.26866	9.68492	4.73335	5.7252	5.27798
208962_s_at	FADS1	4.64051	Up	11.7395	12.4289	11.8468	11.3687	11.5559	11.3172	9.71682	6.7046	10.7287	6.81634	1.37851
208964_s_at	FADS1	3.7331	Up	11.909	12.5465	12.0474	11.4892	12.3014	11.8917	9.91827	7.13545	11.3461	6.89118	6.19771
208963_x_at	FADS1	3.08949	Up	11.1897	11.6475	10.7552	10.5007	10.8953	10.5141	8.90087	6.91409	10.194	6.82528	6.30378
226905_at	FAM101B	6.8112	Up	10.8799	14.57	12.3134	12.0669	12.3607	10.5729	11.9191	5.07468	6.3147	1.20163	2.07039
226876_at	FAM101B	4.58826	Up	11.1233	14.1289	12.1822	11.5953	11.6849	10.6457	12.0216	6.32553	7.43879	4.94017	5.79961
209285_s_at	FAM208A	2.25076	Up	10.8121	11.7024	10.537	10.231	9.74483	11.0126	8.35931	9.66871	8.80961	8.65607	6.61912
242828_at	FIGN	3.59298	Up	10.9024	5.37156	8.8051	10.3846	9.74601	9.64746	5.97728	2.48543	8.63735	5.41278	5.23649
1552473_at	GAMT	2.67154	Up	9.22231	9.25597	8.2484	8.87344	6.8189	8.69592	8.32103	4.64386	6.90207	4.42626	4.94486
225710_at	GNB4	5.73255	Up	11.6836	11.4007	10.6917	6.70598	10.0406	12.2021	5.01346	2.58496	9.83936	2	4.16993
227059_at	GPC6	5.38882	Up	10.7304	5.1334	10.1665	11.9325	11.9356	8.88325	6.1416	1.53605	10.1303	3.23266	1
213069_at	HEG1	3.80283	Up	7.74281	7.34784	8.66782	10.7828	9.43588	9.7386	6.6837	6.48382	5.12102	1.76553	5.69488
230454_at	ICA1L	2.28774	Up	8.6664	7.62644	7.77808	7.35843	8.02569	8.75389	6.89239	5.63227	7.24793	3.60881	5.35403
227377_at	IGF2BP1	5.75931	Up	11.0968	8.12928	9.08295	10.952	8.51924	9.40067	3.29278	3.53605	4.19377	5.06609	2.76553
223689_at	IGF2BP1	5.28824	Up	9.36545	7.46107	10.2946	9.00085	8.01346	8.95768	2.82782	4.97728	3.20163	3.24793	3.54844
221974_at	IPW	4.77087	Up	10.0639	10.673	9.02209	8.79669	8.37721	9.35843	4.73335	4.41954	9.77215	3.36457	0.765535
201389_at	ITGA5	3.92287	Up	9.54303	10.9525	9.51116	5.17792	10.0638	10.2518	8.86882	6.2384	3.30743	3.12102	5.10014
203710_at	ITPR1	4.7183	Up	6.42794	10.3933	7.70736	9.12954	9.62242	9.10983	5.42291	3.01792	7.54226	1.67807	2.40599
226001_at	KLHL5	4.78427	Up	11.7613	7.14057	11.6423	11.1768	11.9182	13.4444	9.50204	7.08108	7.893	7.36807	0.137504
232297_at	KLHL5	3.81972	Up	10.4017	6.69488	9.63717	9.06097	10.342	11.8129	7.68018	5.64674	5.43962	6.01346	4.41278
227565_at	KLHL5	3.13416	Up	9.60807	5.90929	8.38759	8.67313	10.2024	10.8279	7.46924	5.66391	6.07895	6.1819	3.60881
200771_at	LAMC1	2.26172	Up	12.3112	9.33181	12.2754	12.3048	12.5059	11.4393	9.53372	10.6355	9.53489	9.281	8.17991
226546_at	LOC100506844	3.53531	Up	8.52826	10.8604	9.92229	8.33807	9.65785	10.8689	8.12722	8.57592	6.56529	5.60881	1.926
229007_at	LOC283788	2.96412	Up	8.00899	8.39146	6.74012	7.62352	7.46107	7.73539	6.32193	7.05961	4.49185	1.48543	4.12102
220253_s_at	LRP12	4.35742	Up	9.34496	8.38629	9.42585	5.83794	8.56186	9.54496	7.84235	0.765535	5.57592	6.02901	0.584963
212850_s_at	LRP4	3.96345	Up	9.93516	4.87283	8.6136	8.83826	7.72656	7.77017	7.63735	2.8679	3.94486	2.94486	2.58496
218573_at	MAGEH1	4.0284	Up	9.52982	6.60288	9.45882	8.45245	9.25998	9.72741	4.10434	5.03122	8.44501	5.33271	1.1375
226084_at	MAP1B	4.77928	Up	10.0752	3.23266	12.4619	8.32598	11.0485	11.2349	7.00899	3.15381	6.10643	4.78136	2.03562
212233_at	MAP1B	3.6337	Up	10.7548	5.42626	13.0232	9.23242	11.7323	11.8206	8.12619	5.8679	7.33718	6.20163	5.95652
204069_at	MEIS1	3.02622	Up	11.1597	11.6667	7.13545	7.20555	7.97039	7.40599	4.59694	5.48864	6.96232	5.30012	6.30743
211071_s_at	MLLT11	3.93321	Up	13.1417	7.21237	12.8099	7.69	13.8209	11.283	6.15178	7.97556	5.96347	8.97928	6.22882
205079_s_at	MPDZ	3.81519	Up	10.4686	5.24793	9.08693	9.08534	7.88448	9.26725	2.29278	5.67807	7.96924	4.22497	3.29278
202974_at	MPP1	2.90156	Up	8.49265	9.71905	8.82432	8.79896	10.6886	9.71459	8.38111	9.27473	4.12102	5.76288	4.81762
235316_at	NAT8L	2.85745	Up	7.62571	7.633	8.17043	7.2555	8.78234	7.53605	7.16892	3.16993	5.82782	5.54535	3.16993
202007_at	NID1	6.28051	Up	11.8836	3.63227	8.59395	11.6932	10.0839	9.71098	1.07039	9.40152	0.765535	1.926	1.76553
202008_s_at	NID1	3.89581	Up	10.2105	6.0045	7.58346	10.3347	8.57403	8.35138	3.10434	7.55689	4.60288	3.30743	4.49825
201310_s_at	NREP	3.03223	Up	12.0794	12.3817	9.35447	12.207	10.9551	10.5605	8.28124	8.64926	8.83352	9.15886	6.19771
201309_x_at	NREP	2.97321	Up	11.0019	10.2126	7.90689	11.0943	9.73657	8.78038	7.24031	6.69209	7.51096	7.80155	4.83289
203879_at	PIK3CD	4.35157	Up	7.1467	13.0198	8.2114	9.64024	10.8071	8.32957	7.55612	3.15381	5.20555	5.1127	4.84298
212263_at	QKI	5.015	Up	10.7456	11.7052	10.754	11.3571	10.8407	10.6896	9.02237	9.93	8.72758	1.32193	1
212636_at	QKI	4.78074	Up	5.75756	10.2859	9.49545	9.82082	10.3179	8.84109	5.67525	7.13648	5.23649	1.63227	1.848
212262_at	QKI	3.38943	Up	9.28309	10.1716	10.0079	10.31	9.92244	10.1073	8.17193	8.5411	7.02791	4.49185	4.65535
214543_x_at	QKI	3.02648	Up	9.6182	9.52023	9.52552	10.4573	9.90989	8.66818	8.19131	9.14057	6.72792	3.07039	5.82018
224710_at	RAB34	5.98773	Up	12.4827	11.483	12.537	3.45943	10.8677	11.174	3.98185	11.292	1.88753	3.24793	1.32193
1555630_a_at	RAB34	5.81728	Up	13.0341	11.882	13.0159	4.24793	11.4564	11.6395	4.51096	11.8553	2.43296	3.26303	3.24793
1558116_x_at	RECK	5.12585	Up	7.08852	7.4187	7.95768	7.43713	7.3837	9.51649	6.96578	1.96347	-0.514573	3.47249	1.48543
205407_at	RECK	4.78211	Up	8.04111	8.07735	7.95884	7.59021	8.14873	8.45943	5.61471	4.20163	-0.321928	3.44626	3.37851
1558115_at	RECK	3.23264	Up	7.55075	7.14466	8.13545	7.28633	7.43129	9.11296	6.97613	3.6893	1.926	5.23266	4.89724
213194_at	ROBO1	4.92637	Up	12.4126	6.01792	10.3872	12.4195	10.4798	11.4376	3.79701	5.05745	9.35887	5.2854	4.49825
212158_at	SDC2	6.93336	Up	13.24	11.5331	6.1127	13.8171	10.2323	10.6851	1.76554	1.37851	10.9253	3.59694	2.3505
212154_at	SDC2	5.02327	Up	12.604	9.99605	5.30012	13.4834	10.2428	9.61985	3.26303	4.7866	10.1257	4.16189	3.58496
212157_at	SDC2	3.17238	Up	10.3031	8.36282	5.94954	10.6116	7.93015	8.01681	5.56986	3.74416	7.4733	4.83794	5.15785
202499_s_at	SLC2A3	5.49423	Up	12.1747	10.1799	7.76089	11.9372	10.1412	8.75087	6.22882	0	4.86295	4.33628	7.88813
202497_x_at	SLC2A3	4.89543	Up	11.6017	8.82528	8.66853	12.0832	10.4162	8.58684	7.16491	5.47249	3.21723	1.67807	8.1416
202498_s_at	SLC2A3	4.67965	Up	10.995	8.44004	7.11998	10.7366	8.52199	8.79214	5.48864	4.88264	1.58496	2.58496	7.56529
226591_at	SNRPN	5.6049	Up	10.1449	10.2036	7.0917	10.1356	7.11374	7.05745	5.01346	1.72247	8.66605	-0.152003	-0.152003
226587_at	SNRPN	4.06618	Up	10.3261	11.7886	8.4822	9.82925	8.69766	8.1918	5.71973	5.16189	8.98783	2.7866	4.7761
1560741_at	SNRPN	2.99922	Up	8.42878	10.3792	8.09961	8.68159	8.24079	7.47086	3.52356	5.56986	8.16892	5.17393	5.31832
244661_at	SOAT1	2.7895	Up	9.41722	8.04221	8.81954	8.61213	10.1892	9.42122	6.61029	7.41193	6.926	3.81762	6.7046
212526_at	SPG20	5.74303	Up	8.50581	12.5003	11.1179	9.28864	10.3823	11.9099	5.52042	5.23649	6.27053	5.66676	1.67807
204872_at	TLE4	2.70696	Up	10.6716	10.3317	9.40684	6.46434	9.18933	9.53216	6.50621	5.45286	5.11686	7.59619	8.12309
219410_at	TMEM45A	3.51607	Up	11.5987	7.96751	8.40088	10.7205	11.4632	7.98868	9.18686	5.6865	5.70874	4.87774	5.40939
215146_s_at	TTC28	5.17002	Up	10.6746	11.1071	8.59656	9.70009	8.89936	9.64386	3.47249	3.47249	7.14873	3.80735	5.10014
213058_at	TTC28	3.83754	Up	10.0725	10.5294	7.96751	9.68843	9.28378	9.46312	5.80478	4.83794	6.75622	5.78398	5.1334
228882_at	TUB	4.63418	Up	9.61379	5.97957	9.16164	8.92422	9.64476	9.09144	2.926	5.06609	7.55305	0.584963	4.37851
209822_s_at	VLDLR	3.61988	Up	10.0271	10.2922	9.69731	6.12309	9.93502	8.96203	5.16993	3.01792	7.25644	7.18686	5.1334
223714_at	ZNF256	3.59245	Up	9.01011	7.88203	6.86419	8.56643	9.03039	8.46475	4.84298	5.14568	8.89724	1	3.66676
238937_at	ZNF420	3.78042	Up	8.14822	9.09011	8.18785	7.95012	7.39318	9.20384	2.82782	5.54226	9.5343	2.45943	2.37851
242761_s_at	ZNF420	3.21195	Up	8.81346	9.56739	8.95099	9.16817	8.42585	8.80445	3.73335	5.91409	9.80365	6.22882	3.03562
1569366_a_at	ZNF569	2.29661	Up	7.75889	7.41363	8.53138	8.01011	7.74281	8.86635	4.94486	5.70874	8.42752	5.23266	4.47249
226514_at	ZNF71	3.21102	Up	7.9847	7.57894	8.7269	7.89482	7.91588	7.85985	3.99096	4.32912	8.37895	3.93546	3.27798
221927_s_at	ABHD11	-2.33594	Down	9.47715	9.80864	8.62059	8.35623	11.1301	8.8173	11.088	12.08	11.9953	11.0255	12.3327
238439_at	ANKRD22	-3.44301	Down	2.43296	7.33271	5.52356	4.60288	5.89239	5.00899	7.37938	7.89845	8.82941	10.5084	8.26068
209369_at	ANXA3	-5.69609	Down	5.14975	1.63227	13.1166	10.3941	9.77791	5.24413	14.1048	13.0999	12.453	12.6237	13.9614
213618_at	ARAP2	-3.0078	Down	3.24793	5.44626	5.4822	4.20163	7.00113	8.8125	8.74517	9.32035	7.56224	9.05066	8.85362
205239_at	AREG	-4.85478	Down	4.48543	2.60881	12.6207	8.88417	9.75205	8.63662	14.2312	11.583	10.2963	13.1095	14.2103
210791_s_at	ARHGAP32	-1.94898	Down	7.77083	7.39146	7.04111	7.74012	7.87098	8.01067	8.00843	10	9.68229	10.3665	9.87529
203431_s_at	ARHGAP32	-2.30677	Down	8.18686	8.4417	6.93074	8.77512	8.36676	8.37069	9.03232	10.8049	10.6052	11.4954	10.4893
208009_s_at	ARHGEF16	-2.64618	Down	5.62936	4.38543	4.18587	8.06232	7.15178	3.7761	7.49345	7.56377	8.07468	9.40535	8.35271
204765_at	ARHGEF5	-4.25609	Down	2.848	3.33628	6.61176	7.7039	2.07039	8.4623	8.2621	9.64854	9.1982	10.3104	9.72178
1554835_a_at	B3GNT5	-2.45668	Down	5.77347	5.91886	6.07682	5.07895	7.58346	5.70044	9.11035	8.56643	7.18488	8.2293	9.30241
209502_s_at	BAIAP2	-1.88297	Down	6.42962	5.51096	5.7252	7.76818	7.6388	6.65535	8.68264	8.28263	7.88874	8.70701	8.96058
211518_s_at	BMP4	-7.02463	Down	1.88753	2.10434	7.71836	12.3727	1.58496	2.72247	12.076	13.2644	7.33807	13.2045	12.8988
212925_at	C19orf21	-3.80742	Down	5.68089	6.62644	10.9442	6.55459	5.30743	5.88264	9.72247	12.0844	9.65392	10.9139	10.8259
223631_s_at	C19orf33	-6.46574	Down	5.30012	3.30743	13.9335	7.11374	5.05311	4.94017	12.2301	12.7438	12.5424	14.1336	13.7188
228865_at	C1orf116	-5.0632	Down	0.678072	4.00899	8.84518	5.83542	3.10434	6.1127	7.24031	11.0458	8.22738	10.4422	12.1809
219474_at	C3orf52	-2.71419	Down	3.98185	4.83289	8.45039	6.58946	6.40769	8.62899	9.68807	8.4582	9.37699	9.20016	9.25692
1554314_at	C6orf141	-3.44289	Down	5.31832	5.09592	8.47857	5.30012	3.7761	5.59991	7.82146	9.6388	9.93103	9.15381	8.6435
1552575_a_at	C6orf141	-5.28288	Down	2.26303	1.48543	8.34651	2.51096	6.10224	4.39917	8.63771	10.9537	9.35711	9.85534	8.53333
201131_s_at	CDH1	-7.89252	Down	1.48543	2.7866	8.87744	9.42878	2.60881	3.10434	11.013	12.1193	13.98	13.3077	12.6187
226185_at	CDS1	-3.4179	Down	5.31832	6.41447	7.97327	9.77479	7.61912	6.6879	10.7011	9.82161	11.1092	10.8319	11.1154
205709_s_at	CDS1	-3.64433	Down	2.7866	5.44956	7.19081	8.70148	7.48704	6.30195	9.724	8.75856	10.2217	10.1183	10.997
223232_s_at	CGN	-3.18357	Down	7.42122	4.37156	7.02569	3.33628	5.62644	7.28633	7.36282	11.128	7.07146	9.22978	10.3487
201428_at	CLDN4	-6.09215	Down	2.70044	3.52356	6.29278	8.52395	4.6893	2.65535	9.24151	12.1418	10.0163	11.0102	11.7055
213050_at	COBL	-4.56679	Down	2.94486	3.3505	6.60733	8.48341	8.07575	3.65535	9.6453	10.5449	10.6563	8.63735	10.9478
207986_x_at	CYB561	-2.35645	Down	8.41363	8.40812	9.6994	6.86047	8.32912	6.29094	9.9678	9.49165	10.7555	10.3534	11.2154
209163_at	CYB561	-2.43398	Down	7.99152	8.18686	9.59488	6.91886	9.12309	6.87774	10.5629	10.002	10.7895	10.8252	10.5679
217200_x_at	CYB561	-2.46389	Down	8.43087	8.19476	9.90779	7.74483	8.81057	7.00787	10.6861	9.71922	10.9571	11.2252	11.4791
209164_s_at	CYB561	-2.59764	Down	8.67313	8.56834	9.63027	6.94134	8.79669	6.40259	10.5903	9.80719	11.2956	11.0544	11.0843
210749_x_at	DDR1	-2.75592	Down	8.04385	6.03342	10.1896	9.59488	9.28401	10.1036	11.2647	12.5999	11.0836	11.0351	12.1708
208779_x_at	DDR1	-2.86308	Down	7.3156	5.47897	9.62004	9.26021	8.83763	10.176	11.1166	12.3759	10.9329	10.4276	11.7028
207169_x_at	DDR1	-3.15674	Down	7.56453	4.41278	9.75872	9.33427	9.15025	10.216	11.3465	12.7106	11.1751	10.7981	11.7839
221081_s_at	DENND2D	-4.16142	Down	5.35403	9.26679	5.29278	1.80735	5.04876	5.24413	9.20726	9.09276	8.98584	11.2328	8.96665
212729_at	DLG3	-2.31734	Down	8.35931	5.36457	6.22882	7.76288	7.48623	6.49985	8.41151	10.0308	9.23146	9.14568	9.51865
212728_at	DLG3	-2.57725	Down	7.91588	4.2555	4.76022	6.39403	7.17592	5.62936	7.81186	9.38672	8.7652	8.90177	8.1298
212727_at	DLG3	-3.16348	Down	7.72996	4.48543	5.92837	7.43212	7.24127	4.04439	8.23649	10.0142	9.04958	9.98556	9.24959
1554334_a_at	DNAJA4	-3.46556	Down	5.04439	9.53605	3.89724	4.89724	6.70321	6.53761	10.5153	8.64061	10.2473	8.79149	9.6462
225061_at	DNAJA4	-5.13071	Down	1.88753	10.5164	2.67807	4.54226	7.26585	4.74416	11.0119	9.48784	11.5258	9.68071	10.3092
1554333_at	DNAJA4	-5.61967	Down	-0.736966	8.23601	3.72247	0.847997	4.94017	0.378512	9.20506	7.03122	9.81986	7.47654	9.05582
204751_x_at	DSC2	-2.64788	Down	5.94486	4.20945	6.32733	8.33226	5.19771	7.11998	8.19771	9.76388	8.76454	8.17343	9.28286
226817_at	DSC2	-3.38731	Down	7.1375	5.99322	8.06609	11.3248	7.32553	10.4847	11.2597	12.2131	12.0256	11.0562	12.3251
204750_s_at	DSC2	-4.43606	Down	5.50144	2.48543	7.02015	9.82241	0.925999	8.22689	10.7365	10.2192	10.0565	9.1316	10.3551
226034_at	DUSP4	-5.11879	Down	2.37851	5.82273	9.70874	2.20163	9.8631	3.56072	10.354	11.6098	11.8148	8.13391	11.6276
202669_s_at	EFNB2	-5.27592	Down	4.56072	2.29278	6.32912	5.52356	10.9483	3.75489	10.7459	12.0917	9.70252	10.3585	11.322
202668_at	EFNB2	-5.46802	Down	6.46107	5.15381	7.00675	5.8505	12.3057	4.60881	12.1887	13.2842	11.7505	11.664	12.9415
209536_s_at	EHD4	-1.84946	Down	9.43546	8.6851	9.55094	8.96376	9.57043	9.73961	11.6345	10.654	10.1794	11.3593	12.0412
210827_s_at	ELF3	-3.71617	Down	7.01235	5.42962	11.2672	8.63081	7.71081	4.23266	9.47513	12.9439	10.7582	11.1908	11.1157
229842_at	ELF3	-4.42152	Down	2.43296	1.72247	9.05257	5.37851	5.64386	2.3505	7.30104	10.5448	8.14466	9.43275	8.8351
201839_s_at	EPCAM	-7.28427	Down	6.22304	0.378512	9.3443	13.208	7.42291	5.80219	14.2535	14.603	13.6634	14.5714	14.6458
205977_s_at	EPHA1	-3.29139	Down	2.94486	7.56605	4.48543	8.07842	3.52356	3.74416	8.27566	6.43129	7.90328	9.65678	9.47533
208156_x_at	EPPK1	-3.0107	Down	5.45943	5.35755	6.90689	8.39232	6.90689	3.45943	8.99124	8.84549	8.19967	9.7975	9.62169
232164_s_at	EPPK1	-4.46552	Down	1.26303	4.06178	6.70736	10.1198	5.47897	5.54844	8.69627	8.91528	10.1066	10.8573	11.4017
232165_at	EPPK1	-4.81628	Down	0.925999	2.74416	6.65105	10.5448	6.86171	2.37851	8.76719	8.93103	9.93015	10.9137	10.6278
229223_at	ESRP2	-2.99996	Down	6.30561	6.21529	5.17792	8.64997	5.79181	4.48543	8.21335	7.95245	10.5262	9.72724	9.10224
219395_at	ESRP2	-5.92243	Down	1.88753	2.74416	2.51096	9.68229	1.26303	5.61765	10.3113	8.33807	10.9339	9.86573	9.91782
1555829_at	ESYT2	-2.85699	Down	7.21626	6.3345	7.35138	6.5157	7.29186	6.96347	9.68194	10.3141	9.17742	9.41003	10.4291
204503_at	EVPL	-3.34533	Down	3.26303	1.848	8.1205	7.17991	4.93074	3.08746	7.90569	9.51668	7.633	7.75756	7.60511
223000_s_at	F11R	-2.58241	Down	8.37504	8.85144	11.2996	12.2423	11.2974	11.1001	12.3492	13.0674	13.6172	13.2885	13.2279
221664_s_at	F11R	-2.76359	Down	7.02015	7.0045	10.103	11.035	9.50005	8.83637	10.9631	11.7414	12.032	11.9664	11.6977
219429_at	FA2H	-3.55193	Down	4.61471	5.33628	9.31084	5.95187	6.37156	6.60733	7.75087	10.2358	9.25974	10.7877	11.5527
225436_at	FAM108C1	-2.54303	Down	9.27356	7.28633	9.64097	9.14491	9.22159	7.02348	10.1685	11.6812	10.6297	11.1604	12.0677
226863_at	FAM110C	-6.27477	Down	0.263034	4.59096	2.74416	7.34607	8.24079	1	10.2005	11.4984	9.22641	11.1817	9.42101
225864_at	FAM84B	-5.35608	Down	3.60881	5.76818	6.04658	7.40939	9.57422	8.07146	9.77643	13.1515	12.5386	13.333	11.713
230559_x_at	FGD4	-2.98998	Down	4.94486	4.57894	7.07361	7.04002	2.10434	6.52826	6.76022	8.26585	8.0045	9.08958	9.72144
208228_s_at	FGFR2	-3.74988	Down	3.63227	2.94486	5.02237	6.47086	8.21529	7.15583	8.71356	9.8469	5.85549	9.89875	12.3026
226599_at	FHDC1	-1.79898	Down	5.59991	7.20163	6.62205	6.0268	6.86666	6.54071	7.08002	8.76951	9.01987	8.17293	8.33405
222773_s_at	GALNT12	-4.12212	Down	8.20604	5.20945	6.16993	1.88753	7.98982	3.33628	9.2628	9.54419	7.3966	11.0937	10.6458
218885_s_at	GALNT12	-4.95504	Down	9.02763	2.40599	7.39575	1.37851	8.47938	2.43296	9.4508	9.91797	8.22448	11.8306	11.2849
210002_at	GATA6	-4.2946	Down	4.70044	3.59694	8.47005	8.41574	9.18388	2.848	8.86759	10.9799	9.61324	11.1568	11.868
224209_s_at	GDA	-4.06757	Down	5.16993	6.47411	7.69209	5.71425	6.09381	8.6994	11.6863	12.8555	5.25927	11.9455	11.7943
229372_at	GOLT1A	-5.09454	Down	0.137504	1.37851	5.96809	9.42605	1.72247	1	7.30012	8.86109	7.78529	9.05826	8.82845
219313_at	GRAMD1C	-3.53211	Down	7.47816	2.23266	2.80735	2.16993	5.17792	7.19574	7.6893	8.58909	9.1982	7.47897	7.25644
227163_at	GSTO2	-4.59388	Down	6.53761	4.07039	7.34163	6.71699	3.26303	10.9327	12.4745	11.6009	8.12257	11.2873	11.8693
203394_s_at	HES1	-2.51112	Down	10.0864	6.16591	8.95129	9.92496	9.17393	8.22497	9.71802	10.9839	12.0424	11.3614	12.2228
205366_s_at	HOXB6	-3.03956	Down	9.25668	6.64674	7.81634	3.63227	5.79181	7.60881	9.53255	10.9819	7.78333	10.8075	10.0531
204779_s_at	HOXB7	-3.47578	Down	8.50024	6.55612	10.6605	4.94486	7.46516	9.36107	11.4116	10.6317	12.2665	11.7064	10.936
216973_s_at	HOXB7	-3.61417	Down	8.19377	5.94486	10.4367	4.85798	7.12722	9.1267	11.2064	10.3112	12.1404	11.6941	10.7915
204778_x_at	HOXB7	-3.6547	Down	7.61102	6.31107	10.2733	5.18982	7.98698	7.80155	11.558	10.5929	11.8905	11.5072	10.3696
207949_s_at	ICA1	-3.62201	Down	5.1375	6.55152	2.20163	4.26303	8.80381	6.54535	7.2075	8.59954	10.3455	10.3238	9.55267
210547_x_at	ICA1	-3.90096	Down	5.37156	5.82018	5.31107	1.1375	8.62388	6.71562	7.51806	8.98783	10.4462	10.2428	9.79312
204990_s_at	ITGB4	-4.1466	Down	4.46597	5.80993	7.49105	7.55152	7.28633	4.09592	9.55401	13.0076	6.53605	11.0231	11.1962
201189_s_at	ITPR3	-2.50367	Down	6.65105	7.6279	8.93428	8.96521	11.3111	8.8759	11.0552	11.6442	10.2723	11.6927	11.4919
229139_at	JPH1	-3.31854	Down	9.52591	6.6837	5.0045	5.02237	8.74685	5.41616	10.6381	10.1831	10.6393	8.45861	10.3399
201015_s_at	JUP	-4.09255	Down	8.55267	4.04439	10.9487	8.95768	5.66676	7.55536	10.2876	12.2417	11.6624	12.0831	12.2924
204678_s_at	KCNK1	-5.76734	Down	4.54844	1.20163	8.90779	0.847997	8.04494	5.78921	10.0053	13.1664	10.6219	9.28031	10.2127
204679_at	KCNK1	-5.90681	Down	1.80735	5.63807	10.8715	4.26303	10.5668	4.83289	11.3572	14.223	12.3732	11.2925	11.9379
226534_at	KITLG	-4.078	Down	8.87498	3.71149	9.66071	8.40769	9.18537	11.2209	14.4722	12.2386	11.8955	12.2803	12.0543
221841_s_at	KLF4	-3.74457	Down	3.79701	7.84486	9.51531	6.05528	11.727	7.09803	10.8947	12.7472	10.567	10.116	12.7625
209211_at	KLF5	-4.45377	Down	4.32912	5.95884	10.4874	6.84172	7.06501	8.30469	10.1918	11.8695	10.3298	12.65	13.0502
209212_s_at	KLF5	-4.81887	Down	4.71149	5.61471	10.5929	7.45368	8.07361	7.56682	10.8711	13.022	10.3682	13.4493	13.0615
201650_at	KRT19	-9.59764	Down	1.20163	2.29278	10.3313	12.5084	1.1375	2.32193	14.3292	15.0185	14.6498	14.152	14.6666
203287_at	LAD1	-3.59672	Down	4.43296	5.22882	6.78267	8.92689	5.3505	6.81762	9.44791	9.88004	8.87529	10.8276	10.2357
216641_s_at	LAD1	-4.6265	Down	3.36457	3.10434	4.47249	9.11764	4.6893	4.926	9.13699	9.19081	8.56758	11.1278	9.83794
222457_s_at	LIMA1	-2.05114	Down	10.6728	9.13571	10.5772	9.99817	7.91767	10.2734	11.5204	12.1883	11.052	12.192	12.1155
222456_s_at	LIMA1	-4.45199	Down	3.36457	5.71973	6.75087	8.39189	4.97728	5.83794	8.34917	11.0261	10.2212	10.3681	11.4973
235871_at	LIPH	-4.82848	Down	4.01792	2.37851	8.62717	4.66107	3.75489	2.43296	7.02015	11.3713	7.50779	8.85829	10.9453
1554006_a_at	LLGL2	-2.69154	Down	6.78398	6.41785	7.65177	9.11218	4.83289	7.07682	9.16792	9.53333	9.32305	9.32665	11.003
218816_at	LRRC1	-2.81708	Down	8.05528	5.15381	8.02348	10.2973	6.853	8.15532	9.49625	11.6375	10.5101	10.2675	10.9559
208190_s_at	LSR	-3.97832	Down	8.72007	2.88753	7.22014	10.4091	8.84862	5.08746	10.6248	10.8342	10.3695	12.3541	11.6865
202890_at	MAP7	-5.17863	Down	3.30743	2.20163	12.1958	3.65535	9.77988	4.54226	10.7421	10.0261	11.3576	11.9213	11.5814
210059_s_at	MAPK13	-3.90774	Down	4.77083	4.98641	4.61471	8.93458	4.43962	5.9472	8.75989	7.73877	9.72503	10.6714	10.7214
210058_at	MAPK13	-4.11755	Down	2.53605	5.97269	6.3906	10.0913	6.52513	5.47573	9.98613	7.82591	10.626	11.4517	11.5243
235955_at	MARVELD2	-3.59859	Down	4.0268	4.17792	7.69766	9.19771	5.85798	3.23266	9.3156	9.60825	9.63626	8.38888	9.53625
235141_at	MARVELD2	-3.67254	Down	4.56682	6.24222	9.17093	10.8553	7.98242	6.80864	10.6543	11.6331	11.7555	10.7209	11.6208
233634_at	MARVELD3	-3.74947	Down	4.91169	5.54844	4.12101	7.14057	3.47249	2.88753	7.77676	7.69139	9.71579	8.43505	8.52982
239148_at	MARVELD3	-5.61094	Down	2	3.16993	1.48543	8.13955	2	3.75489	8.69383	7.85985	9.78953	9.09196	9.74433
225325_at	MFSD6	-2.74376	Down	5.80735	7.30561	10.8324	7.50779	8.78823	9.19032	9.66498	11.7837	10.7141	11.2041	11.5451
219858_s_at	MFSD6	-3.95432	Down	1.07039	4.61471	8.30788	5.24413	5.36457	6.88996	8.08799	10.5852	8.79019	8.98328	9.56796
1552930_at	MMEL1	-2.04942	Down	5.926	6.73471	5.64386	6.02901	6.46923	7.02569	7.00675	8.24508	8.85674	9.18289	8.47938
203780_at	MPZL2	-3.48214	Down	4.58496	5.73606	3.81762	8.78234	5.58496	4.7866	8.20653	8.46393	8.94749	10.0588	9.47776
234290_x_at	MYH14	-2.82579	Down	6.41785	3.53605	6.30378	7.20555	5.99548	4.90689	7.25361	8.60955	8.16239	9.65714	9.08428
212338_at	MYO1D	-4.41386	Down	1.26303	2.20163	5.67807	7.68089	3.15381	8.43296	7.47492	10.4155	9.08507	8.89966	9.86944
225301_s_at	MYO5B	-3.43427	Down	5.87283	5.43962	10.6736	10.4325	7.94837	7.5812	11.1195	10.553	12.0611	11.1935	12.2011
225299_at	MYO5B	-3.87676	Down	2.60881	4.47897	6.5744	8.46271	4.17792	5.45943	8.84674	8.60214	10.1991	8.94749	9.25692
210480_s_at	MYO6	-3.66718	Down	3.08746	2.82782	7.56986	7.70183	8.16138	8.40088	9.25715	10.7688	9.88249	10.4742	9.41088
206023_at	NMU	-4.1692	Down	5.70874	5.16993	6.92481	5.10434	11.0776	8.40088	13.3631	12.6076	9.15254	7.78986	13.2548
59625_at	NOL3	-2.69035	Down	6.78136	4.30012	7.92659	7.26772	7.22786	7.17093	8.74147	9.70719	10.307	9.51452	9.07708
221567_at	NOL3	-3.68004	Down	6.24413	1.63227	7.39489	5.25172	7.13134	2.82782	8.45861	8.60474	9.55286	9.05447	8.13134
223298_s_at	NT5C3	-1.784	Down	11.0185	10.7472	11.1969	10.9312	9.6453	11.0817	11.7396	13.5336	12.3271	12.7505	12.4199
217744_s_at	PERP	-3.98595	Down	5.39575	6.53605	12.4467	11.7688	11.1442	7.43796	12.5725	13.8034	12.5454	12.6203	13.996
223551_at	PKIB	-3.62777	Down	3.90689	10.936	5.44956	5.76022	8.79442	7.47654	12.1302	9.67966	12.0195	10.6059	8.97327
209873_s_at	PKP3	-2.87769	Down	5.24031	4.94017	9.03672	9.24365	8.36282	7.30561	9.73098	10.609	10.0072	10.4111	10.4046
209872_s_at	PKP3	-3.38164	Down	1.53605	2.29278	7.3345	7.41363	5.70321	6.51885	7.77347	9.1871	7.9431	9.27891	8.39146
229245_at	PLEKHA6	-4.70476	Down	1	1	7.40599	7.25172	2	2.8679	6.99549	9.78202	7.56453	9.65625	7.46352
222699_s_at	PLEKHF2	-2.14066	Down	6.75355	8.56529	8.11374	8.77742	7.49985	8.67948	9.32733	10.261	12.0737	9.37786	9.98783
220073_s_at	PLEKHG6	-2.64079	Down	2.70044	5.87529	6.46761	7.87713	4.43962	5.62059	7.10643	8.62863	7.83668	8.61545	8.50064
209529_at	PPAP2C	-4.05796	Down	5.15785	4.55459	10.5473	4.86295	9.20335	6.16993	11.2896	12.5154	8.29278	10.9106	11.028
226961_at	PRR15	-4.42823	Down	3.58496	1.67807	7.02348	8.0864	6.19771	4.87774	5.04876	11.826	10.37	10.3893	10.714
213421_x_at	PRSS3	-4.98054	Down	5.12516	6.10224	8.32057	6.20555	7.73132	3.44626	11.7311	14.1357	4.47249	12.237	13.1023
221872_at	RARRES1	-4.89938	Down	2.90689	3.30743	9.33092	0.485427	8.16491	2.8679	5.8505	12.3121	9.02569	9.8275	10.034
209885_at	RHOD	-5.44438	Down	1.07039	1.926	9.00955	1.43296	8.51531	3.07039	9.67119	10.2389	8.41109	8.25267	11.5019
203453_at	SCNN1A	-6.33627	Down	5.31832	2.20163	4.54226	10.8718	4.33628	4.97269	10.3062	12.6388	11.8722	12.3891	11.3442
224762_at	SERINC2	-3.71469	Down	1.58496	8.37981	2.74416	7.93899	6.62644	3.60881	8.38284	9.5795	9.2353	9.34163	7.77017
33322_i_at	SFN	-3.7216	Down	7.9629	8.18933	13.6176	9.74164	8.38974	9.27286	14.3955	13.7513	11.5041	13.1002	13.502
33323_r_at	SFN	-4.61011	Down	7.15684	6.39917	13.9936	10.1178	8.00056	7.33807	14.527	13.8903	11.7827	13.2969	13.7253
209260_at	SFN	-5.54918	Down	2.26303	2.58496	10.3618	6.62936	3.62059	2.98185	11.5438	10.8233	8.17343	10.3487	10.558
204019_s_at	SH3YL1	-2.98462	Down	10.0877	11.2671	9.34806	11.3671	9.37112	6	10.5675	13.216	13.326	12.58	13.1013
225548_at	SHROOM3	-3.64892	Down	8.06555	4.77083	7.41109	1.926	6.09592	6.49985	8.53333	9.20261	10.1173	9.45018	9.91558
228400_at	SHROOM3	-4.44533	Down	8.43087	3.9542	8.44997	1.76553	6.44626	5.45943	9.0207	10.1946	10.784	10.2098	10.7727
213590_at	SLC16A5	-2.2824	Down	6.27798	7.55228	8.4271	6.05745	6.11061	6.67948	8.88996	9.76967	9.02542	9.84046	8.14057
206600_s_at	SLC16A5	-3.54699	Down	6.59544	7.77083	8.85112	6.3345	5.65821	6.73064	9.29278	12.0414	10.0201	11.2087	10.1226
213664_at	SLC1A1	-3.63883	Down	5.0917	5.4363	7.02569	4.2555	9.56148	6.16189	9.29738	10.5899	8.91468	12.052	8.61728
218928_s_at	SLC37A1	-4.51052	Down	2.32193	7.75556	4.04439	2.16993	7.14568	2.07039	7.21723	10.3062	8.99859	9.80413	7.48301
209679_s_at	SMAGP	-4.73096	Down	2.23266	2.51096	9.47776	9.30743	8.23745	7.95478	11.2816	11.951	9.63209	12.3894	11.5016
202826_at	SPINT1	-6.59314	Down	0.765535	8.27473	4.94486	3.45943	5.04876	3.21723	10.0999	10.8033	10.3611	11.8756	11.2513
210715_s_at	SPINT2	-7.18295	Down	1.43296	9.5074	12.5889	4.41278	4.60288	2.43296	12.3456	13.1632	12.9204	13.5069	13.1268
216985_s_at	STX3	-1.94696	Down	7.76421	6.84046	7.02126	8.31786	8.49025	8.46271	8.89482	9.53333	10.3347	9.43003	10.6225
205759_s_at	SULT2B1	-2.73023	Down	5.2211	5.71699	8.46066	6.07895	3.54844	4.75489	7.25927	7.79572	8.60807	9.44232	8.69662
213913_s_at	TBC1D30	-4.44653	Down	5.32912	8.22159	6.3505	1.07039	5.34696	2.98185	9.20579	7.52826	11.3533	9.13057	9.43171
205016_at	TGFA	-3.34505	Down	3.67807	6.66959	8.55305	9.56014	7.90026	6.67101	10.9495	11.0655	8.28586	10.457	11.8276
222904_s_at	TMC5	-4.07976	Down	3.96347	5.45943	7.83857	5.05745	6.52982	5.70044	7.76951	11.3969	9.15558	9.57118	11.2966
219580_s_at	TMC5	-4.90525	Down	5.0045	5.38543	8.26913	4.66676	6.37851	4.07895	8.21772	12.3987	9.61655	10.5319	11.9142
240304_s_at	TMC5	-7.25654	Down	0.925999	1.32193	9.62461	1.07039	7.2891	4.91648	9.49265	13.3019	10.5172	11.4486	12.4794
225536_at	TMEM54	-3.10337	Down	8.15684	5.99548	9.10617	4.67807	9.89527	9.76736	9.99647	10.953	10.4047	12.6583	11.1704
235775_at	TMTC2	-2.86056	Down	7.71081	4.46597	6.81506	3.48543	6.66534	6.16993	7.65105	10.2783	8.52904	8.95681	8.3147
217979_at	TSPAN13	-3.60807	Down	11.3485	7.27426	12.957	10.9506	9.02486	8.04821	11.9647	13.1098	14.7732	13.8163	14.0459
226482_s_at	TSTD1	-7.94005	Down	2.10434	4.52982	1.32193	2.40599	10.0031	3.54844	11.7742	11.4643	13.0822	12.0314	11.2762
210652_s_at	TTC39A	-3.59773	Down	6.74147	1.88753	6.48059	5.53294	7.12516	4.51728	8.11166	7.35755	11.4682	9.17991	8.77545
227919_at	UCA1	-4.09968	Down	4.14568	5.86047	6.65105	6.3505	4.80735	7.01458	12.1476	10.8291	8.80703	9.28979	8.44956
204254_s_at	VDR	-2.58856	Down	5.54844	9.72383	6.77083	6.78529	9.33762	7.29646	9.69192	10.0031	10.8694	9.981	10.2827
221704_s_at	VPS37B	-1.86619	Down	8.30104	8.38457	8.52435	8.0268	10.0208	8.224	9.84439	10.3692	10.7396	10.7138	10.5653
228950_s_at	WLS	-3.57492	Down	5.15785	5.71699	6	3.07039	10.6181	8.77643	9.30058	10.4421	10.3991	10.5282	9.98783
228949_at	WLS	-3.58447	Down	4.94017	4.37851	6.18587	4.50462	10.8247	7.507	9.81474	10.5905	10.4994	9.67013	9.29829
221958_s_at	WLS	-3.90498	Down	5.54844	4.6893	7.33985	4.15381	11.0914	9.93899	9.8989	11.1927	11.6061	11.2712	11.1909
222760_at	ZNF703	-3.47926	Down	3.64386	6.0268	6.44128	7.26397	8.81698	3.1375	6.84549	10.5688	9.73877	9.15911	10.5261
